# Supplementary material
Source: publisher site journal article supplement (http://kjim.org/upload/media/kjim-2020-636-suppl1.pdf)
Supplement: Supplementary file 1 [file kjim-2020-636-suppl1.pdf]

**Supplementary Table 1. Univariate and multivariate analyses for overall survival in 83 patients in age  $\geq$  70**

| Characteristic              | Univariate        |                | Multivariate     |                |
|-----------------------------|-------------------|----------------|------------------|----------------|
|                             | HR (95% CI)       | <i>p</i> value | HR (95% CI)      | <i>p</i> value |
| Gender                      |                   |                |                  |                |
| Male vs. female             | Incalculable      | 1.00           |                  |                |
| ECOG PS                     |                   |                |                  |                |
| 2–3 vs. 0–1                 | 2.39 (0.71–8.02)  | 0.157          |                  |                |
| Smoking history             |                   |                |                  |                |
| Current or former vs. never | 1.31 (0.48–3.62)  | 0.597          |                  |                |
| Alcohol history             |                   |                |                  |                |
| Drink vs. Do not drink      | 1.21 (0.48–3.07)  | 0.689          |                  |                |
| HPV status                  |                   |                |                  |                |
| Positive vs. Negative       | 0.18 (0.02–1.45)  | 0.106          |                  |                |
| Unknown vs. Negative        | 0.53 (0.22–1.28)  | 0.156          |                  |                |
| Primary tumor location      |                   |                |                  | 0.002          |
| Oropharynx                  | 1 (reference)     |                | 1 (reference)    |                |
| Oral cavity                 | 3.83 (1.24–11.85) | 0.020          | 3.33 (1.54–7.22) |                |
| Hypopharynx                 | 1.06 (0.23–4.75)  | 0.943          |                  |                |
| Larynx                      | 1.35 (0.34–5.40)  | 0.675          |                  |                |
| Others                      | 1.26 (0.23–2.97)  | 0.787          |                  |                |
| T classification            | 1.06 (0.74–1.53)  | 0.736          |                  |                |
| N classification            | 1.04 (0.60–1.80)  | 0.897          |                  |                |
| Induction chemotherapy      |                   |                |                  |                |
| Yes vs. No                  | 0.75 (0.30–1.89)  | 0.547          |                  |                |
| Treatment strategy          |                   |                |                  |                |
| CCRT                        | 1 (reference)     |                |                  |                |
| Surgery                     | 1.61 (0.68–3.83)  | 0.283          |                  |                |
| Inadequate                  | 2.40 (0.79–7.25)  | 0.121          |                  |                |

HR, hazard ratio; CI, confidence interval; ECOG, Eastern Cooperative Oncology Group; PS, performance status; HPV, human papilloma virus; CCRT, concurrent chemoradiotherapy.
